# Supplementary material for: Protective Effects of Intraoperative Nerve Monitoring (IONM) for Recurrent Laryngeal Nerve Injury in Thyroidectomy: Meta-analysis
Source: PubMed Central journal article supplement (PMC5958090; doi:10.1038/s41598-018-26219-5), 2018-05-17
Supplement: 41598_2018_26219_MOESM1_ESM.pdf [file 41598_2018_26219_MOESM1_ESM.pdf]

# **Protective Effects of Intraoperative Nerve Monitoring (IONM) for Recurrent Laryngeal Nerve Injury in Thyroidectomy: Meta-analysis**

Binglong Bai<sup>1</sup>; Wuzhen Chen<sup>2\*</sup>

1. Department of General Surgery (Thyroid Center), Second Affiliated Hospital, School of Medicine, Zhejiang University, Hangzhou, Zhejiang, P. R. China.
2. Department of Surgical Oncology, Second Affiliated Hospital, School of Medicine, Zhejiang University, Hangzhou, Zhejiang, P. R. China.

*\*Correspondence Author*

*Wuzhen Chen*

*Department of Surgical Oncology, Second Affiliated Hospital, Zhejiang University School of Medicine,*

*Hangzhou 310009, China.*

*E-mail: chenwuzhen@zju.edu.cn*

**Appendix Table 1.** Incidence of total, transient and permanent RLN injury

| Study                        | Patients, NAR |          | Total RLN injury |          | Transient RLN injury |          | Permanent RLN injury |          |
|------------------------------|---------------|----------|------------------|----------|----------------------|----------|----------------------|----------|
|                              | IONM          | Non-IONM | IONM             | Non-IONM | IONM                 | Non-IONM | IONM                 | Non-IONM |
| Brauckhoff <sup>50</sup>     | 91            | 78       | 1                | 3        | 1                    | 2        | 0                    | 1        |
| Thomusch <sup>2</sup>        | 2483          | 4650     | 41               | 136      | 32                   | 99       | 9                    | 37       |
| Dralle <sup>5</sup>          | 17832         | 5517     | 626              | 193      | 483                  | 144      | 143                  | 49       |
| Robertson <sup>3</sup>       | 116           | 120      | 5                | 8        | 4                    | 5        | 1                    | 3        |
| Yarbrough <sup>4</sup>       | 72            | 79       | 11               | 11       | 9                    | 8        | 2                    | 3        |
| Witt <sup>34</sup>           | 83            | 107      | 6                | 4        | 4                    | 3        | 2                    | 1        |
| Chan <sup>6</sup>            | 501           | 499      | 21               | 26       | 17                   | 20       | 4                    | 6        |
| Netto <sup>35</sup>          | 169           | 158      | 12               | 12       | 6                    | 7        | 6                    | 5        |
| Shindo <sup>36</sup>         | 671           | 372      | 13               | 7        | 11                   | 6        | 2                    | 1        |
| Terris <sup>37</sup>         | 92            | 84       | 4                | 5        | 4                    | 5        | 0                    | 0        |
| Atallah <sup>38</sup>        | 181           | 240      | 16               | 22       | 9                    | 13       | 7                    | 9        |
| Barczynski <sup>51</sup>     | 1000          | 1000     | 27               | 65       | 19                   | 38       | 8                    | 12       |
| Dionigi <sup>39</sup>        | 55            | 57       | 1                | 3        | 1                    | 3        | 0                    | 0        |
| Frattini <sup>40</sup>       | 152           | 152      | 4                | 7        | 2                    | 6        | 2                    | 1        |
| Sari <sup>41</sup>           | 146           | 140      | 3                | 3        | 3                    | 3        | 0                    | 0        |
| Barczynski <sup>42</sup>     | 302           | 302      | 9                | 20       | 6                    | 15       | 3                    | 5        |
| Alesina <sup>8</sup>         | 128           | 161      | 8                | 5        | 8                    | 4        | 0                    | 1        |
| Gremillion <sup>43</sup>     | 41            | 121      | 2                | 4        | 2                    | 3        | 0                    | 1        |
| Chuang <sup>44</sup>         | 70            | 15       | NS*              | NS*      | NS#                  | NS#      | 1                    | 3        |
| Prokopakis <sup>45</sup>     | 60            | 61       | 1                | 6        | 1                    | 6        | 0                    | 0        |
| Alesina <sup>46</sup>        | 553           | 1155     | 17               | 34       | 15                   | 31       | 2                    | 3        |
| Barczynski <sup>14</sup>     | 500           | 826      | 20               | 72       | 13                   | 52       | 7                    | 20       |
| De Falco <sup>47</sup>       | 600           | 600      | 5                | 13       | 1                    | 8        | 4                    | 5        |
| Sanguinetti <sup>48</sup>    | 210           | 490      | 9                | 17       | 9                    | 13       | 0                    | 4        |
| de Danschutter <sup>49</sup> | 85            | 85       | 2                | 8        | 2                    | 2        | 0                    | 6        |
| Page <sup>15</sup>           | 612           | 922      | 22               | 24       | 16                   | 18       | 6                    | 6        |
| Anuwong <sup>10</sup>        | 1545          | 698      | 91               | 59       | 74                   | 47       | 17                   | 12       |
| Brajcich <sup>21</sup>       | 531           | 517      | NS*              | NS*      | NS#                  | NS#      | 4                    | 3        |
| Calo <sup>22</sup>           | 2712          | 2018     | 32               | 29       | 25                   | 21       | 7                    | 8        |
| Hei <sup>11</sup>            | 47            | 60       | 1                | 1        | 1                    | 1        | 0                    | 0        |
| Lv <sup>23</sup>             | 156           | 185      | 2                | 14       | 2                    | 14       | 0                    | 0        |
| Vasileiadis <sup>24</sup>    | 2962          | 2150     | 19               | 71       | 15                   | 51       | 4                    | 20       |
| Xie <sup>25</sup>            | 98            | 69       | 6                | 9        | 5                    | 7        | 1                    | 2        |
| Kai <sup>26</sup>            | 455           | 381      | 8                | 18       | 6                    | 14       | 2                    | 4        |
| Total                        | 35311         | 24069    | 1045             | 909      | 806                  | 669      | 244                  | 231      |

|           |   |   |       |       |       |       |       |       |
|-----------|---|---|-------|-------|-------|-------|-------|-------|
| Incidence | - | - | 3.01% | 3.86% | 2.32% | 2.84% | 0.69% | 0.96% |
|-----------|---|---|-------|-------|-------|-------|-------|-------|

Abbreviation: NS, not stated.

\* Total RLN injury referred to all postoperative RLN injury, including transient and permanent injury. The total RLN injury in studies, without data of transient injury, were also considered as NS.

**Appendix Table 2.** Details about factors of concern, population type, multicenter or single center and NOS score.

| Author                   | Factors of concern  |              |             | Operation type* | Multicenter or single center | Newcastle-Ottawa Scale |               |         |
|--------------------------|---------------------|--------------|-------------|-----------------|------------------------------|------------------------|---------------|---------|
|                          | Bilateral procedure | Re-operation | Mali-gnancy |                 |                              | Selection              | Comparability | Outcome |
| Brauckhoff <sup>50</sup> |                     |              |             | Open            | Single center                | 4                      | 1             | 2       |
| Thomusch <sup>2</sup>    | √                   |              |             | Open            | Multicenter                  | 4                      | 1             | 3       |
| Dralle <sup>5</sup>      | √                   | √            | √           | Open            | Multicenter                  | 4                      | 1             | 3       |
| Robertson <sup>3</sup>   |                     |              |             | Open            | Single center                | 4                      | 1             | 2       |
| Yarbrough <sup>4</sup>   |                     | √            |             | Open            | Single center                | 4                      | 1             | 2       |
| Witt <sup>34</sup>       |                     |              |             | Open            | Single center                | 4                      | 0             | 3       |
| Chan <sup>6</sup>        |                     | √            | √           | Open            | Single center                | 4                      | 2             | 3       |
| Netto <sup>35</sup>      |                     |              |             | Open            | Single center                | 4                      | 2             | 2       |
| Shindo <sup>36</sup>     |                     |              |             | Open            | Single center                | 4                      | 1             | 2       |
| Terris <sup>37</sup>     |                     |              |             | Endoscopic      | Single center                | 4                      | 1             | 3       |
| Atallah <sup>38</sup>    |                     |              |             | Open            | Single center                | 4                      | 1             | 3       |
| Barczynski <sup>51</sup> |                     |              |             | Open            | Single center                | 4                      | 2             | 3       |
| Dionigi <sup>39</sup>    |                     |              |             | Endoscopic      | Single center                | 4                      | 2             | 2       |
| Frattini <sup>40</sup>   | √                   |              | √           | Open            | Single center                | 4                      | 2             | 3       |
| Sari <sup>41</sup>       |                     |              |             | Open            | Single center                | 4                      | 2             | 3       |
| Barczynski <sup>42</sup> | √                   |              | √           | Open            | Single center                | 4                      | 2             | 3       |
| Alesina <sup>8</sup>     |                     | √            |             | Open            | Single center                | 4                      | 1             | 3       |
| Gremillion <sup>43</sup> |                     |              |             | Open            | Single center                | 4                      | 1             | 1       |

|                              |   |   |   |            |               |   |   |   |
|------------------------------|---|---|---|------------|---------------|---|---|---|
| Chuang <sup>44</sup>         |   | √ |   | Open       | Single center | 4 | 1 | 1 |
| Prokopakis <sup>45</sup>     |   | √ |   | Open       | Single center | 4 | 1 | 2 |
| Alesina <sup>46</sup>        |   |   |   | Open       | Single center | 4 | 2 | 3 |
| Barczynski <sup>14</sup>     |   | √ |   | Open       | Single center | 4 | 0 | 3 |
| De Falco <sup>47</sup>       | √ |   |   | Open       | Single center | 4 | 1 | 3 |
| Sanguinetti <sup>48</sup>    | √ |   |   | Open       | Single center | 4 | 0 | 2 |
| de Danschutter <sup>49</sup> |   |   |   | Open       | Single center | 4 | 2 | 3 |
| Page <sup>15</sup>           | √ |   |   | Open       | Single center | 4 | 1 | 3 |
| Anuwong <sup>10</sup>        |   |   |   | Open       | Single center | 4 | 0 | 3 |
| Brajcich <sup>21</sup>       | √ | √ | √ | Open       | Single center | 4 | 1 | 3 |
| Calo <sup>22</sup>           | √ | √ | √ | Open       | Single center | 4 | 2 | 3 |
| Hei <sup>11</sup>            |   |   | √ | Endoscopic | Single center | 4 | 1 | 3 |
| Lv <sup>23</sup>             |   |   |   | Endoscopic | Single center | 4 | 1 | 3 |
| Vasileiadis <sup>24</sup>    | √ |   |   | Open       | Single center | 4 | 2 | 3 |
| Xie <sup>25</sup>            |   |   | √ | Endoscopic | Single center | 4 | 2 | 3 |
| Kai <sup>26</sup>            |   |   |   | Open       | Single center | 4 | 2 | 3 |

\* Operation type was divided into two type: open operation and endoscopic surgery (minimally invasive surgery and total endoscopic surgery).

**Appendix Table 3.** Meta-analysis of subgroups based on factors of concern.

| Subgroups                                | IONM   |             | Non-IONM |             | RR [95% CI] or RD [95% CI] | p value | Number of studies |
|------------------------------------------|--------|-------------|----------|-------------|----------------------------|---------|-------------------|
|                                          | Events | overall NAR | Events   | overall NAR |                            |         |                   |
| <b>Bilateral procedure</b>               |        |             |          |             |                            |         |                   |
| Total injury                             | 157    | 10746       | 351      | 11667       | 0.57 [0.37, 0.87]          | 0.0086  | 9                 |
| Transient injury                         | 115    | 10746       | 247      | 11667       | 0.57 [0.36, 0.91]          | 0.0182  | 9                 |
| Permanent injury                         | 115    | 22817       | 123      | 16502       | 0.68 [0.46, 0.99]          | 0.0433  | 11                |
| <b>Reoperation</b>                       |        |             |          |             |                            |         |                   |
| Total injury                             | 48     | 908         | 104      | 1203        | 0.64 [0.33, 1.24]          | 0.1843  | 7                 |
| Transient injury                         | 37     | 908         | 75       | 1203        | -0.0113 [-0.0502, 0.0276]* | 0.5687  | 7                 |
| Permanent injury                         | 44     | 1902        | 42       | 1565        | -0.0082 [-0.0176, 0.0013]* | 0.0906  | 9                 |
| <b>Malignancy</b>                        |        |             |          |             |                            |         |                   |
| Total injury                             | 41     | 1579        | 57       | 1307        | 0.61 [0.41, 0.91]          | 0.0163  | 6                 |
| Transient injury                         | 31     | 1579        | 44       | 1307        | 0.61 [0.38, 0.97]          | 0.0355  | 6                 |
| Permanent injury                         | 34     | 2837        | 20       | 1824        | -0.0008 [-0.0061, 0.0046]* | 0.7801  | 8                 |
| <b>Operation sites per year &lt; 300</b> |        |             |          |             |                            |         |                   |
| Total injury                             | 272    | 6463        | 353      | 6657        | 0.78 [0.63, 0.97]          | 0.0271  | 20                |
| Transient injury                         | 209    | 6463        | 265      | 6657        | 0.79 [0.63, 0.99]          | 0.0454  | 20                |
| Permanent injury                         | 68     | 7064        | 94       | 7189        | -0.0012 [-0.0041, 0.0016]* | 0.4003  | 22                |
| <b>Operation sites per year ≥ 300</b>    |        |             |          |             |                            |         |                   |
| Total injury                             | 92     | 7484        | 195      | 6258        | 0.49 [0.26, 0.93]          | 0.0292  | 5                 |
| Transient injury                         | 69     | 7484        | 131      | 6258        | 0.52 [0.25, 1.12]          | 0.0962  | 5                 |

|                                                                       |                  |     |       |     |       |                            |        |    |
|-----------------------------------------------------------------------|------------------|-----|-------|-----|-------|----------------------------|--------|----|
|                                                                       | Permanent injury | 23  | 7484  | 49  | 6258  | 0.46 [0.23, 0.91]          | 0.0247 | 5  |
| Permanent injury definition >6 months and laryngoscopy as measurement |                  |     |       |     |       |                            |        |    |
|                                                                       | Permanent injury | 232 | 33756 | 210 | 22518 | -0.0025[-0.0040, -0.0011]* | 0.0005 | 24 |

\* Data was presented as RD [95% CI] because of studies without any event in either IONM or non-IONM.
